# Supplementary material for: Simultaneous Detection of Influenza A/B, Respiratory Syncytial Virus, and SARS-CoV-2 in Nasopharyngeal Swabs by One-Tube Multiplex Reverse Transcription Polymerase Chain Reaction
Source: MDPI journal article supplement (doi:10.3390/tropicalmed8060326), 2023-06-19
Supplement: s1 [file s1]

Table S1. Confirmed Influenza A positive cases and their CT values were obtained by using different kits.

| Sample ID | Age | Gender | 5-target assay |          | TaqMan Assay kit |          |
|-----------|-----|--------|----------------|----------|------------------|----------|
|           |     |        | Ct Value       | Result   | Ct Value         | Result   |
| A03       | 70  | M      | 29.76          | Positive | 28.56            | Positive |
| A04       | 60  | M      | 25.84          | Positive | 24.96            | Positive |
| A05       | 40  | M      | 27.10          | Positive | 26.84            | Positive |
| A06       | 65  | M      | 30.26          | Positive | 29.31            | Positive |
| A07       | 45  | F      | 21.24          | Positive | 22.56            | Positive |
| A08       | 65  | F      | 31.47          | Positive | 30.95            | Positive |
| A09       | 85  | M      | 32.39          | Positive | 31.25            | Positive |
| A10       | 18  | M      | 24.72          | Positive | 23.41            | Positive |
| A11       | 60  | F      | 24.09          | Positive | 23.94            | Positive |
| A12       | 60  | F      | 21.00          | Positive | 20.00            | Positive |
| B01       | 50  | F      | 20.57          | Positive | 21.00            | Positive |
| B02       | 52  | F      | 24.65          | Positive | 26.00            | Positive |
| B03       | 56  | F      | 23.12          | Positive | 25.00            | Positive |
| B04       | 40  | M      | 25.57          | Positive | 24.98            | Positive |
| B05       | 35  | F      | 24.23          | Positive | 23.89            | Positive |
| B06       | 69  | F      | 21.00          | Positive | 22.00            | Positive |
| B07       | 56  | M      | 24.30          | Positive | 23.00            | Positive |
| B08       | 23  | F      | 19.00          | Positive | 18.30            | Positive |
| B09       | 71  | F      | 30.01          | Positive | 29.96            | Positive |
| B10       | 65  | F      | 29.94          | Positive | 31.00            | Positive |
| B11       | 80  | F      | 27.56          | Positive | 26.80            | Positive |
| B12       | 65  | F      | 29.21          | Positive | 28.95            | Positive |
| C01       | 23  | F      | 26.64          | Positive | 27.40            | Positive |
| C02       | 59  | M      | 28.14          | Positive | 27.90            | Positive |
| C03       | 45  | F      | 24.35          | Positive | 26.30            | Positive |
| C04       | 70  | M      | 27.53          | Positive | 28.00            | Positive |
| C05       | 45  | F      | 23.10          | Positive | 22.00            | Positive |

Table S2. Confirmed Influenza B-positive cases and their CT values were obtained by using different kits.

| Sample ID | Age | Gender | 5 target Assay kit |          | TaqMan Assay kit |          |
|-----------|-----|--------|--------------------|----------|------------------|----------|
|           |     |        | Ct value           |          | Ct value         | Result   |
| D01       | 63  | M      | 28.24              | Positive | 26.84            | Positive |
| D04       | 43  | M      | 29.13              | Positive | 28.02            | Positive |
| D10       | 59  | F      | 28.00              | Positive | 26.53            | Positive |
| D11       | 49  | M      | 24.64              | Positive | 22.67            | Positive |
| D12       | 74  | M      | 29.56              | Positive | 31.02            | Positive |

Table S3. Confirmed SARS-COV-2 positive cases and their CT values were obtained by using different kits.

| Sample ID | Age | Gender | 5 target assay kit |          | Meril kit |                |
|-----------|-----|--------|--------------------|----------|-----------|----------------|
|           |     |        | Ct Value           | Result   | Ct value  | Result         |
| H05       | 57  | F      | 25.15              | Positive | 24        | positive       |
| H06       | 66  | F      | 21.00              | Positive | 20.32     | positive       |
| H07       | 41  | M      | 25.66              | Positive | 35.45     | *late positive |
| H08       | 35  | F      | 21.00              | Positive | 19.56     | positive       |

Table S4. Confirmed RSV-positive cases and their CT values were obtained by using different kits.

| Sample ID | Age | Gender | 5 target Assay kit<br>Ct value | Result   | SuperscriptIII<br>platinum Assay<br>Kit<br>Ct value | Result   |
|-----------|-----|--------|--------------------------------|----------|-----------------------------------------------------|----------|
| E12       | 66  | M      | 21.62                          | Positive | 23.02                                               | Positive |
| F01       | 49  | M      | 19.90                          | Positive | 22                                                  | Positive |
| F02       | 41  | M      | 25.27                          | Positive | 26.52                                               | Positive |
| F03       | 58  | M      | 20.77                          | Positive | 19.05                                               | Positive |
| F04       | 56  | F      | 23.52                          | Positive | 21.56                                               | Positive |
| F05       | 39  | F      | 31.63                          | Positive | 32.4                                                | Positive |
| F06       | 69  | M      | 29.49                          | Positive | 27                                                  | Positive |
| F07       | 58  | M      | 27.03                          | Positive | 29.35                                               | Positive |
| F08       | 72  | M      | 24.12                          | Positive | 23                                                  | Positive |
| F09       | 58  | M      | 29.77                          | Positive | 28.75                                               | Positive |
| F10       | 36  | F      | 32.00                          | Positive | 30.87                                               | Positive |
| F11       | 71  | F      | 29.36                          | Positive | 28.4                                                | Positive |
| F12       | 45  | F      | 32.36                          | Positive | 31.3                                                | Positive |
| G01       | 69  | F      | 29.63                          | Positive | 28.49                                               | Positive |
| G02       | 56  | M      | 28.84                          | Positive | 26.21                                               | Positive |
| G03       | 57  | F      | 32.00                          | Positive | 30.56                                               | Positive |
| G04       | 63  | M      | 27.35                          | Positive | 26                                                  | Positive |
| G05       | 75  | M      | 31.20                          | Positive | 33.02                                               | Positive |

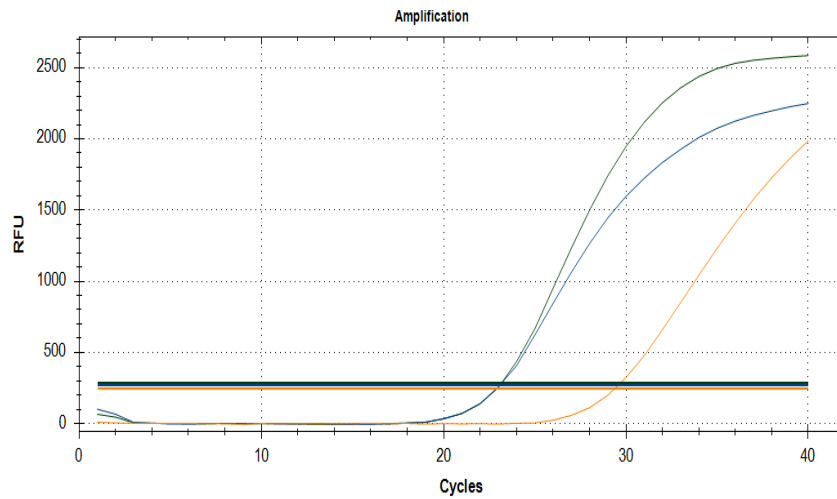

Figure S1. Bio-Rad CFX96 detecting the dyes (FAM,HEX and ROX) for SARS COV-2 ( Meril kit)

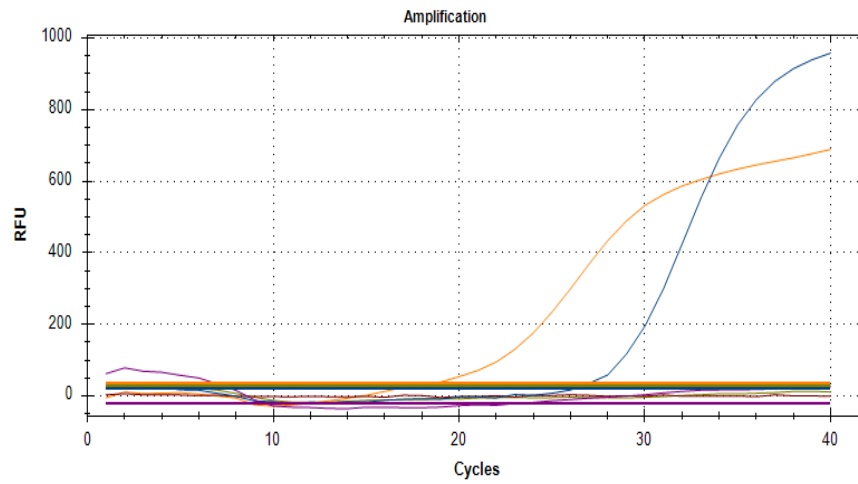

Figure S2. Bio-Rad CFX96 detecting the dye FAM for RSV (TaqMan target Assay Kit )

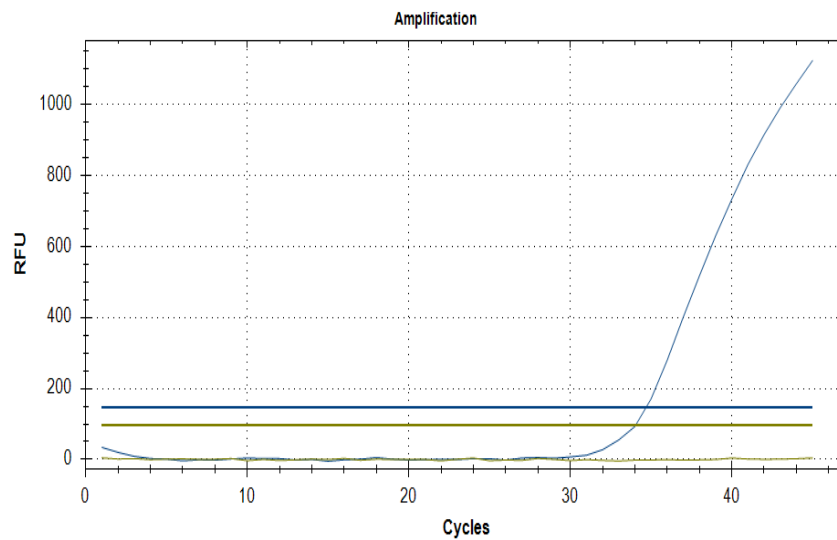

Figure S3 Bio-Rad CFX96 detecting the dye FAM for Influenza A (TaqMan target Assay Kit )

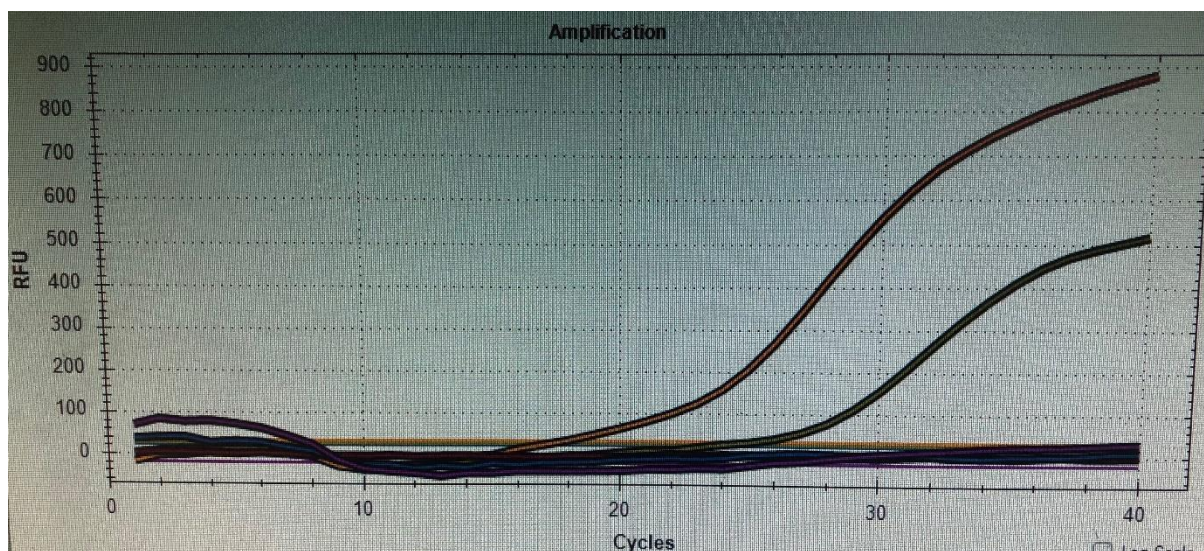

Figure S4 Bio-Rad CFX96 detecting the dye VIC for Influenza B and ROX dye detecting RNaseP (TaqMan target Assay Kit)

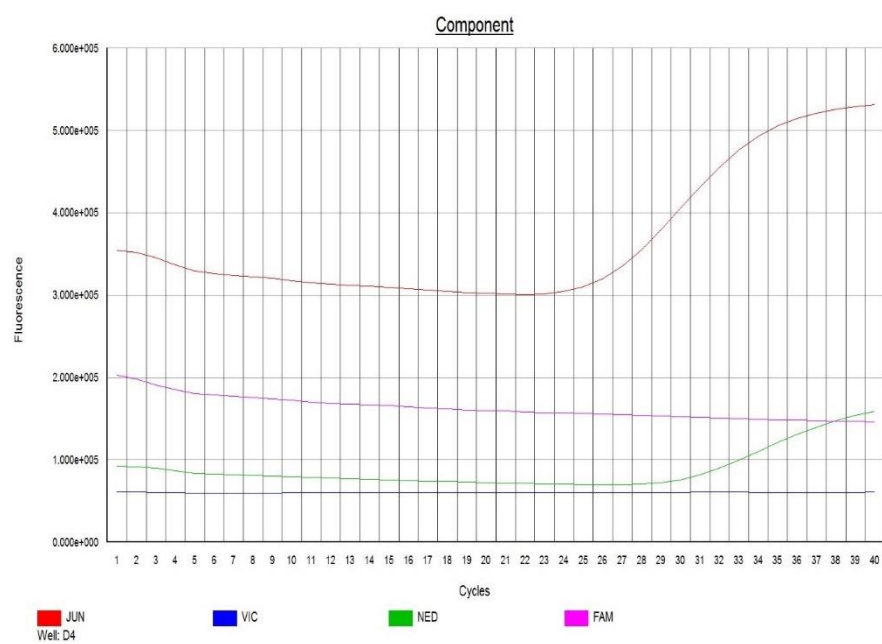

Figure S5 ABI 7500 Fast Dx Real-Time is capable of detecting dye (NED) for Influenza B (multiplex target kit)

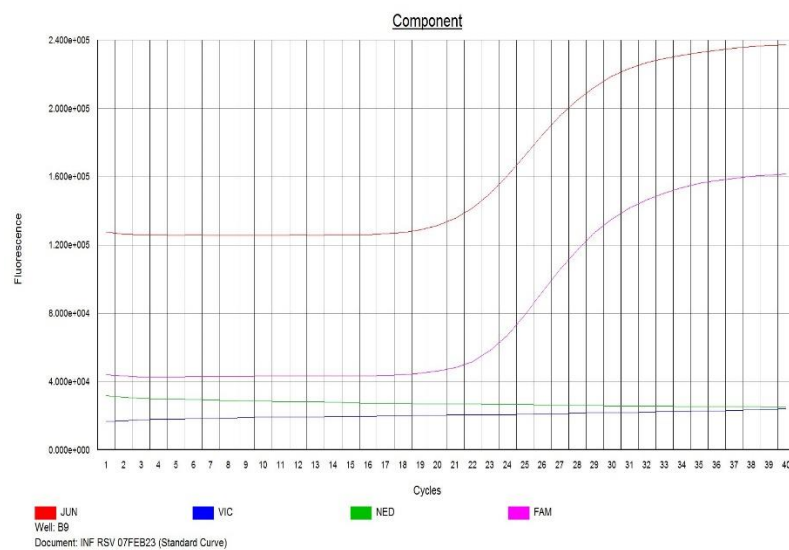

Figure S6 ABI 7500 Fast Dx Real-Time is capable of detecting dye ( FAM ) for RSV (multiplex target kit )

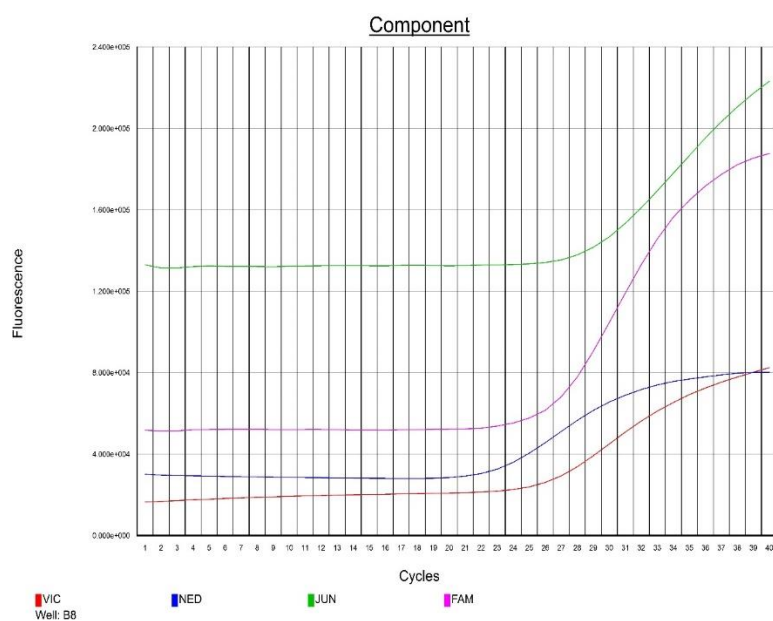

Figure S7 ABI 7500 Fast Dx Real-Time detecting numerous dyes (FAM, VIC, JUN, NED) (multiplex target kit ) JUN ; Actin, FAM; RSV, NED; InfB, VIC; Inf A
